# Supplementary material for: Association of phthalate exposure with precocious and delayed pubertal timing in girls and boys: a systematic review and meta-analysis
Source: Royal Society of Chemistry journal article supplement (doi:10.1039/c9em00512a), 2020-01-01
Supplement: c9em00512a1.pdf [file c9em00512a1.pdf]

**Supporting Information for**  
**Association of Phthalate Exposure with Precocious and Delayed Pubertal**  
**Timing in Girls and Boys: A Systematic Review and Meta-Analysis**

Mohsen Golestanzadeh<sup>a,b</sup>; Roya Riahi<sup>b</sup>; Roya Kelishadi<sup>b\*</sup>

a) *Environment Research Center, Research Institute for Primordial Prevention of Non-Communicable Disease, Isfahan University of Medical Sciences, Isfahan, Iran*

b) *Child Growth and Development Research Center, Research Institute for Primordial Prevention of Non-Communicable Disease, Isfahan University of Medical Sciences, Isfahan, Iran*

*Email: kelishadi@med.mui.ac.ir or roya.kelishadi@gmail.com; Phone: +983137925281 Fax:*

*+983137925280*

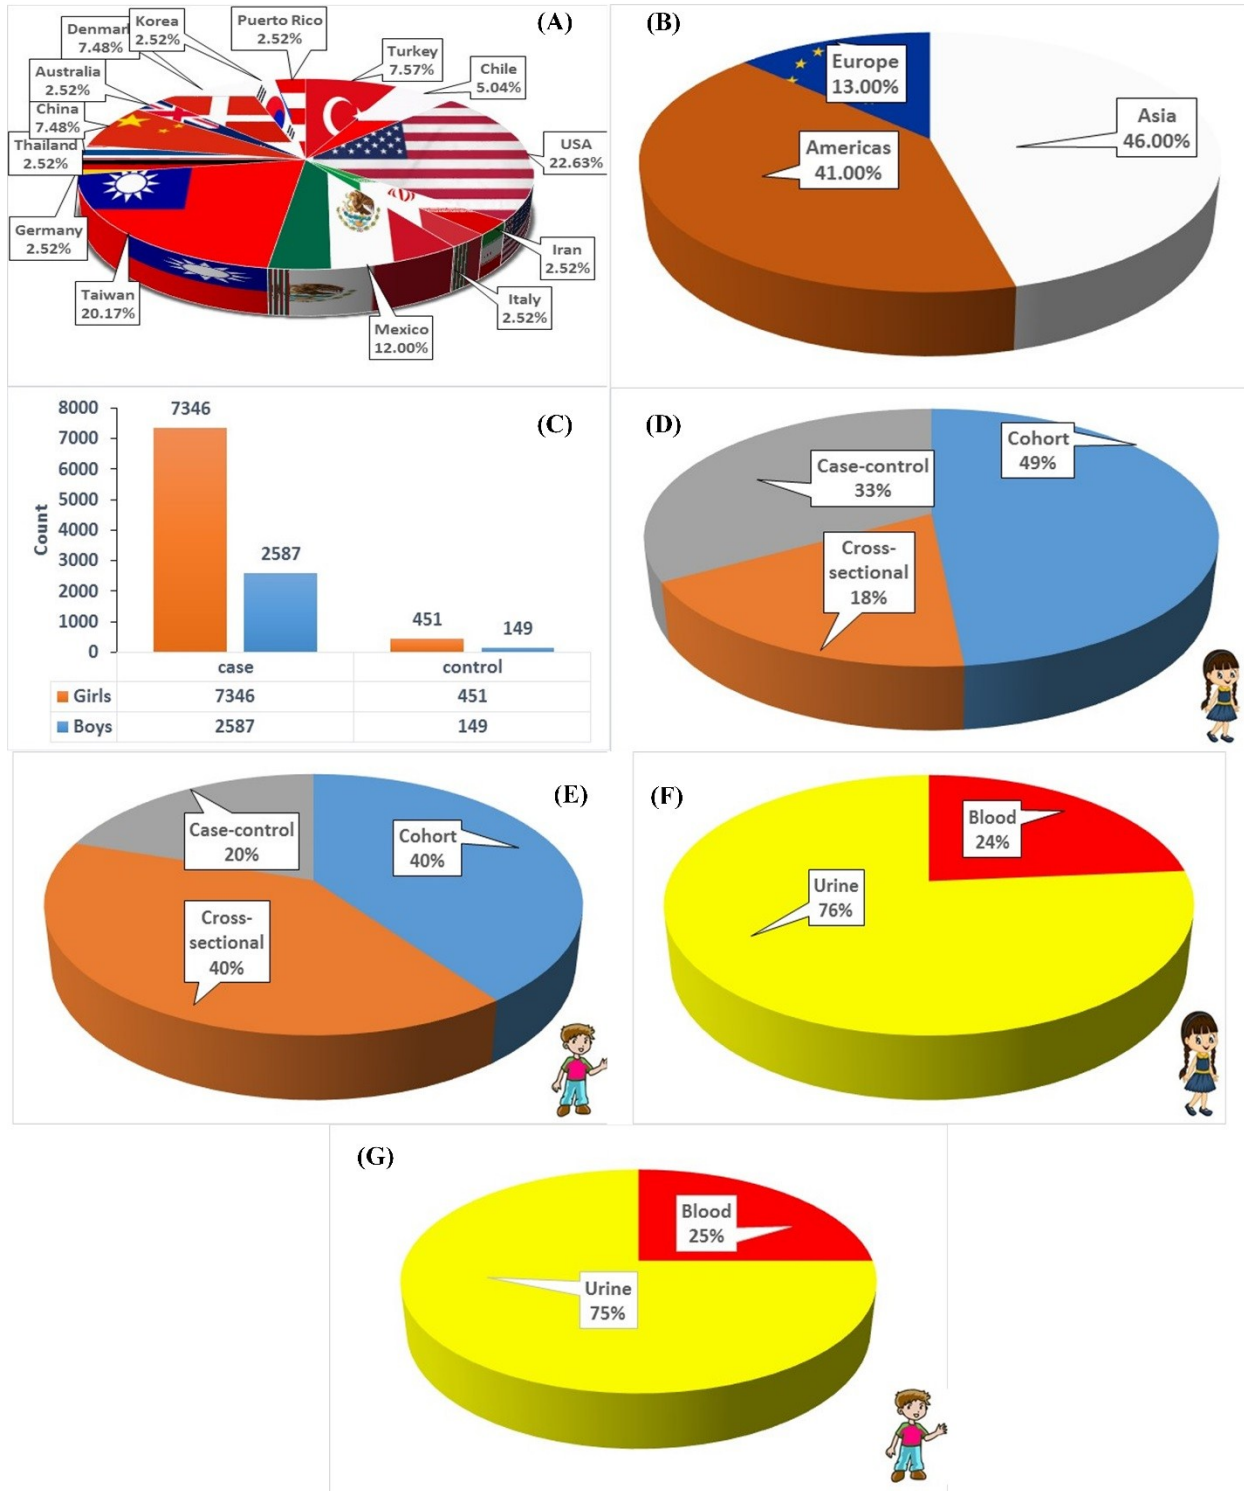

**Figure S1.** Statistical information about studies included in the current systematic review and meta-analysis, (A): Distribution of included studies in different countries, (B): Distribution of included studies in different continents, (C): Sample size in both gender and groups of case and control, (D): Distribution in the study design for pubertal timing in girls group, (E): Distribution in the study design for pubertal timing in boys group, (F): Distribution of performed studies on the test specimen for girl groups, (G): Distribution of performed studies on the test specimen for boy groups

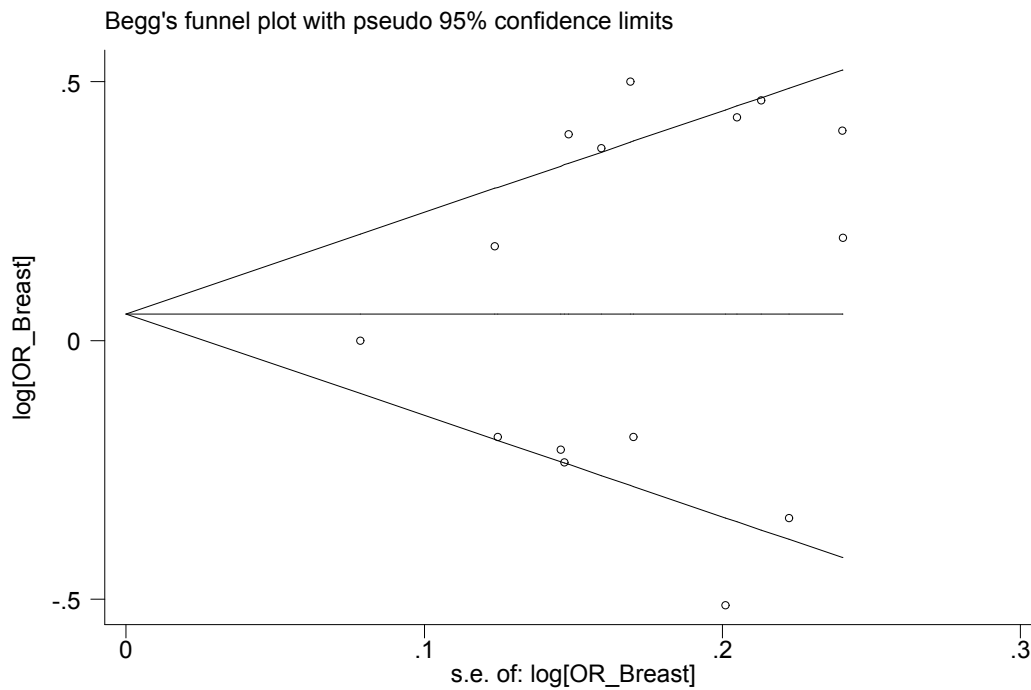

**Figure S2**, Funnel plot, using data in included papers between breast development in girls (Thelarche) and different phthalates

**Table S1**. Test(s) of heterogeneity:

|       | statistic | freedom | P-value | I-squared** | Tau-squared |
|-------|-----------|---------|---------|-------------|-------------|
| MEP   | 7.71      | 2       | 0.021   | 74.1%       | 0.0289      |
| MMP   | 1.75      | 2       | 0.416   | 0.0%        | 0.0000      |
| MnBP  | 3.73      | 1       | 0.053   | 73.2%       | 0.2284      |
| MEHP  | 9.27      | 2       | 0.010   | 78.4%       | 0.1086      |
| MEHHP | 0.05      | 1       | 0.822   | 0.0%        | 0.0000      |
| MEOHP | 0.06      | 1       | 0.809   | 0.0%        | 0.0000      |

\*\* I-squared: the variation in ES attributable to heterogeneity)

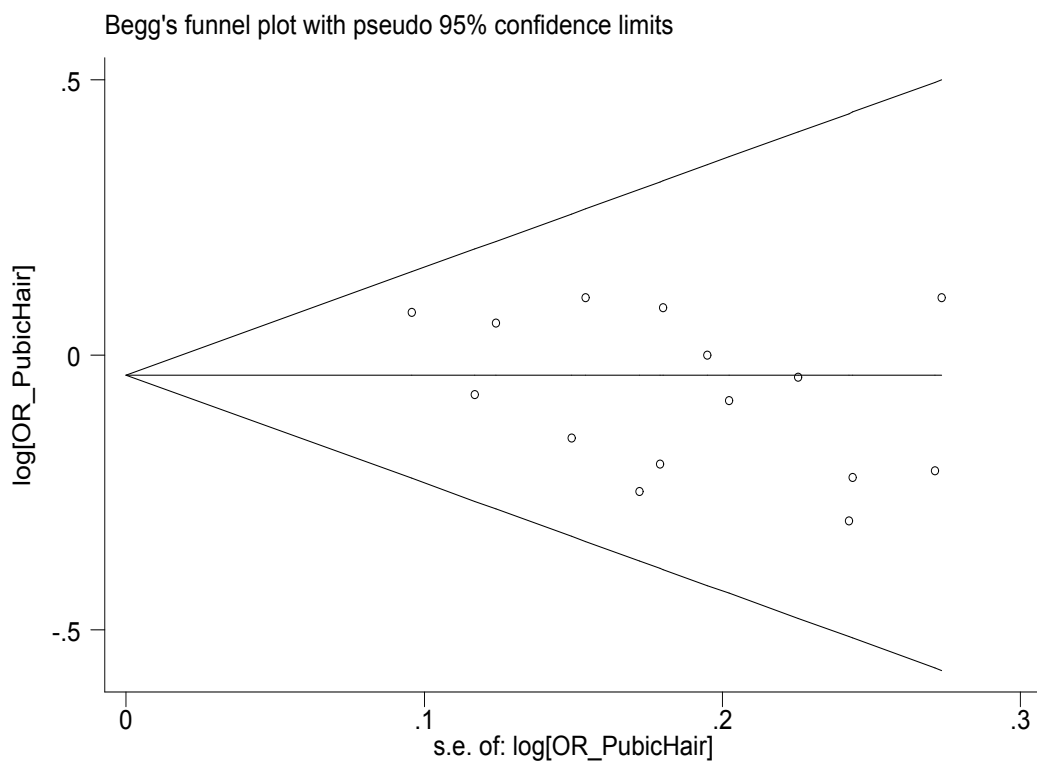

**Figure S3**, Funnel plot, using data in included papers between pubic-hair development in girls (Pubarche) and different phthalates

**Table S2.** Test(s) of heterogeneity:

|       | statistic | freedom | P-value | I-squared** | Tau-squared |
|-------|-----------|---------|---------|-------------|-------------|
| MEP   | 3.34      | 2       | 0.189   | 40.1%       | 0.0103      |
| MMP   | 0.29      | 2       | 0.866   | 0.0%        | 0.0000      |
| MnBP  | 0.13      | 1       | 0.715   | 0.0%        | 0.0000      |
| MEHP  | 1.83      | 2       | 0.400   | 0.0%        | 0.0000      |
| MEHHP | 0.91      | 1       | 0.340   | 0.0%        | 0.0000      |
| MEOHP | 1.02      | 1       | 0.312   | 2.2%        | 0.0009      |

\*\* I-squared: the variation in ES attributable to heterogeneity)

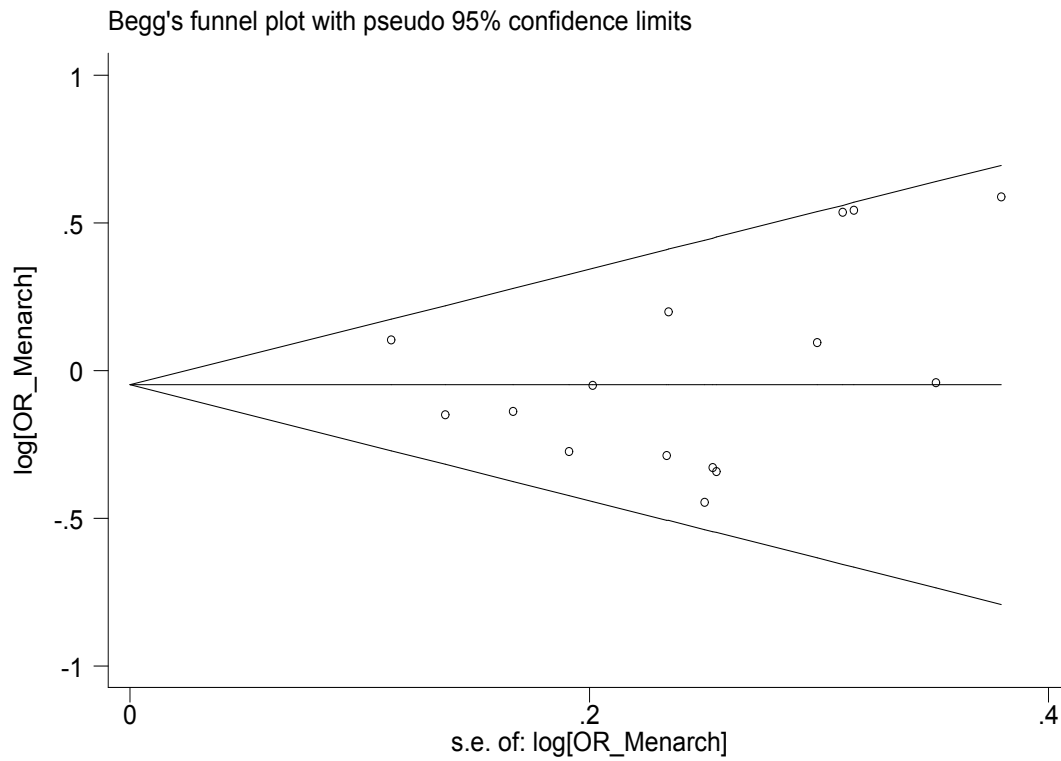

**Figure S4**, Funnel plot, using data in included papers between menarche time in girls and different phthalates

**Table S3.** Test(s) of heterogeneity:

|       | statistic | freedom | P-value | I-squared** | Tau-squared |
|-------|-----------|---------|---------|-------------|-------------|
| MEP   | 5.18      | 2       | 0.075   | 61.4%       | 0.0344      |
| MMP   | 0.47      | 2       | 0.792   | 0.0%        | 0.0000      |
| MnBP  | 1.94      | 1       | 0.164   | 48.4%       | 0.2873      |
| MEHP  | 2.10      | 2       | 0.349   | 5.0%        | 0.0022      |
| MEHHP | 2.69      | 1       | 0.101   | 62.8%       | 0.3140      |
| MEOHP | 2.62      | 1       | 0.105   | 61.8%       | 0.2850      |

\*\* I-squared: the variation in ES attributable to heterogeneity)

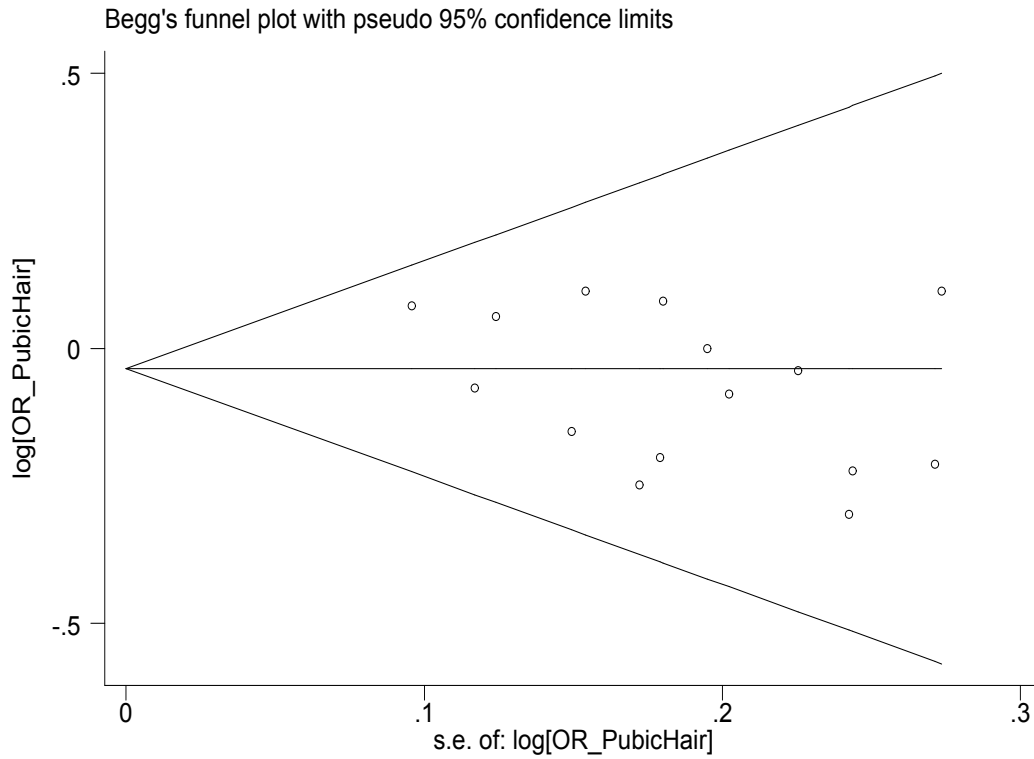

**Figure S5**, Funnel plot, using data in included papers between pubic-hair development in boys (Pubarche) and different phthalates

**Table S4.** Test(s) of heterogeneity:

|       | statistic | freedom | P-value | I-squared** | Tau-squared |
|-------|-----------|---------|---------|-------------|-------------|
| MEP   | 1.88      | 2       | 0.391   | 0.0%        | 0.0000      |
| MMP   | 14.59     | 3       | 0.002   | 79.4%       | 0.1288      |
| MnBP  | 0.37      | 1       | 0.543   | 0.0%        | 0.0000      |
| MEHP  | 4.23      | 2       | 0.121   | 52.7%       | 0.0296      |
| MEHHP | 0.99      | 1       | 0.319   | 0.0%        | 0.0000      |
| MEOHP | 1.35      | 1       | 0.244   | 26.2%       | 0.0209      |

\*\* I-squared: the variation in ES attributable to heterogeneity)

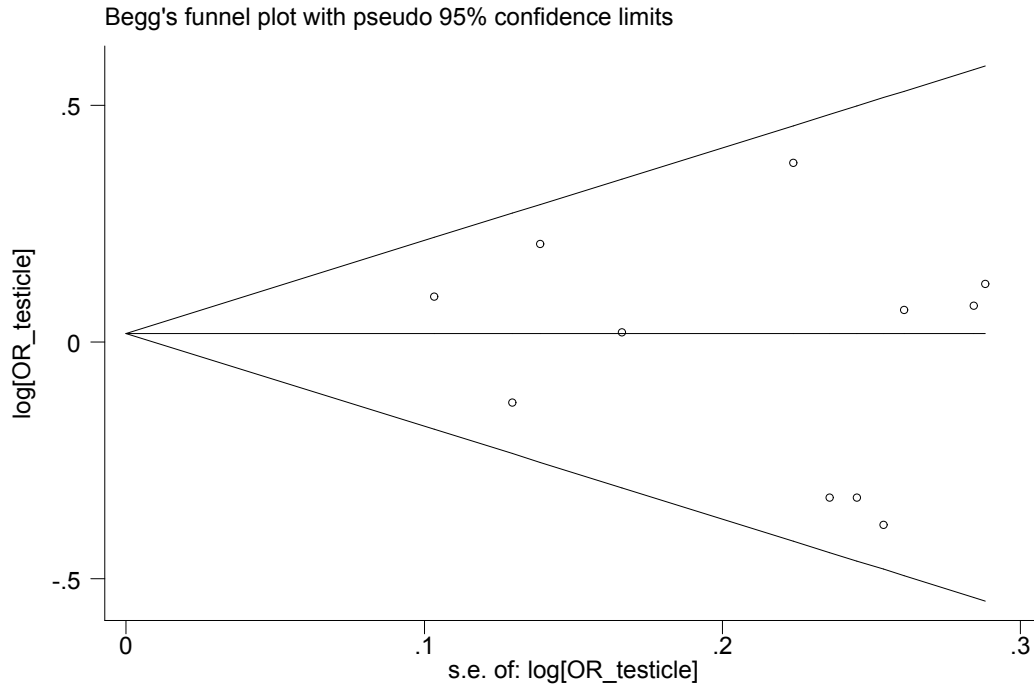

**Figure S6**, Funnel plot, using data in included papers between testicular volume in boys and different phthalates

**Table S5.** Test(s) of heterogeneity:

|       | statistic | freedom | P-value | I-squared** | Tau-squared |
|-------|-----------|---------|---------|-------------|-------------|
| MEP   | 1.84      | 1       | 0.175   | 45.5%       | 0.0110      |
| MMP   | 4.05      | 2       | 0.132   | 50.7%       | 0.0716      |
| MEHP  | 0.73      | 1       | 0.392   | 0.0%        | 0.0000      |
| MEHHP | 1.17      | 1       | 0.280   | 14.5%       | 0.0116      |
| MEOHP | 1.15      | 1       | 0.283   | 13.1%       | 0.0110      |

\*\* I-squared: the variation in ES attributable to heterogeneity)
